# Supplementary material for: Viral meningitis epidemics and a single, recent, recombinant and anthroponotic origin of swine vesicular disease virus
Source: PubMed Central journal article supplement (PMC4661520; doi:10.1093/emph/eov026), 2015-10-27
Supplement: supp_eov026_Bruhn_et_al_supplementary_tables_EMPH.pdf [file supp_eov026_Bruhn_et_al_supplementary_tables_EMPH.pdf]

- 
- a, unknown number of outbreaks-
  - b, not confirmed by laboratory investigations
  - c, one clinical outbreak and one farm where SVDV was isolated from healthy pigs
  - d, all from clinically normal pigs
  - e, 100-200 outbreaks ?
  - f, vesicular disease in pigs on a few farms, SVD suspected but no virus isolated (origin: pig meat from China)
  - g, dates and numbers of outbreaks not known
  - h, no clinical disease, diagnosis based on serology
  - i, virus isolated from one farm, however, approx. four more farms were sero-positive
  - j, sequence analysis suggested that the virus isolated was a laboratory contaminant
  - k, all were sub-clinical infections

SUPPLEMENTARY TABLE S2

GARD analyses

| GARD Analysis # | Genome Region                       | Alignment # seq/51 length | Analysis Converged | Breakpoint positions                                     |
|-----------------|-------------------------------------|---------------------------|--------------------|----------------------------------------------------------|
| 1               | Full                                | 51/51<br>7412             | NO                 | 566, 3602***, 5206***                                    |
| 2               | 5'UTR-1B                            | 51/51<br>1733             | YES                | 566, 932***                                              |
| 3               | 1B-1D<br>(external capsid)          | 51/51<br>2346             | YES                | 1778***                                                  |
| 4               | 1C-2D                               | 51/51<br>2310             | YES                | 2495*                                                    |
| 5               | 1D-3C                               | 51/51<br>2583             | YES                | 3088***                                                  |
| 6               | 2B-3C                               | 51/51<br>2166             | YES                | 4583***                                                  |
| 7               | 3A-3D                               | 51/51<br>2268             | YES                | -                                                        |
| 8               | 3D-3'UTR                            | 51/51<br>1496             | YES                | -                                                        |
| 9               | Full                                | 26/51<br>7412             | NO                 | 566, 818, 1295**,<br>1727***, 3587***,<br>5216           |
| 10              | Full                                | 25/51<br>7412             | YES                | 1295, 3184***                                            |
| 11              | Full                                | 23/51<br>7412             | NO                 | 566, 818, 1094***,<br>1658, 3689**                       |
| 12              | Full                                | 15/51<br>7412             | YES                | 572, 815, 1082***,<br>1883, 2271, 3839***,<br>5206       |
| 13              | Full                                | 51/51<br>7412             | NO                 | 566, 3482***, 5141***                                    |
| 14              | 5'UTR-<br>3'UTR (trimmed)           | 15/51<br>7335             | NO                 | 574, 819, 1146***,<br>1878***, 3645, 3873,<br>5207, 5391 |
| 15              | 5'UTR (trimmed)-<br>3'UTR (trimmed) | 15/51<br>6938             | YES                | 2702, 3529*, 3716***,<br>4946                            |

Analysis #1 is the basic SVDV alignment (BSA). Analysis #10 has the complementary taxa to analysis #9. Analyses 11 and 12 are reduced sets of analysis 9. Analysis 13 only differs from #1 by trimmings in the 5'UTR and 3'UTR. No \* means that there was no support from the Kishino-Hasegawa test, one, two and three stars mean support at  $p = 0.10$ ,  $p = 0.05$  and  $p = 0.01$ , respectively.

### SUPPLEMENTARY TABLE S3

#### Historical occurrence of foot-and-mouth disease in 4 European countries

Reproduced from G. N.Mowat. Epidemiology of foot-and-mouth disease in Europe. *Rev. sci. tech. Off. Int. Epiz.*, 1986, 5 (2), 271-277.

|      | Belgium | France | Netherlands | United Kingdom |
|------|---------|--------|-------------|----------------|
| 1957 | 328     | 99424  | 40          | 184            |
| 1958 | 588     | 14127  | 11          | 116            |
| 1959 | 57      | 6188   | 6           | 45             |
| 1960 | 180     | 7382   | 3           | 298            |
| 1961 | 121     | 2626   | 179         | 103            |
| 1962 | 6       | 199    | 5470        | 5              |
| 1963 | 67      | 28     | 2103        | 0              |
| 1964 | 2       | 56     | 146         | 0              |
| 1965 | 112     | 10     | 1426        | 1              |
| 1966 | 323     | 59     | 2194        | 34             |
| 1967 | 22      | 17     | 196         | 2210           |
| 1968 | 1       | 40     | 0           | 187            |
| 1969 | 3       | 35     | 0           | 0              |
| 1970 | 2       | 4      | 0           | 0              |
| 1971 | 1       | 8      | 21          | 0              |
| 1972 | 0       | 2      | 7           | 0              |
| 1973 | 0       | 1      | 0           | 0              |
| 1974 | 60      | 89     | 3           | 1              |
| 1975 | 21      | 2      | 2           | 0              |
| 1976 | 1       | 0      | 0           | 0              |
| 1977 | 0       | 0      | 1           | 0              |
| 1978 | 0       | 1      | 0           | 0              |
| 1979 | 0       | 21     | 0           | 0              |
| 1980 | 0       | 0      | 0           | 0              |
| 1981 | 0       | 18     | 0           | 2              |
| 1982 | 0       | 0      | 0           | 0              |
| 1983 | 0       | 0      | 4           | 0              |
| 1984 | 0       | 0      | 2           | 0              |
| 1985 | 0       | 0      | 0           | 0              |

## SUPPLEMENTARY TABLE S4

Existing full or near-full genome sequenced SVDV isolates  
included in the basic SVDV alignment

| <b>Accession#</b> | <b>Isolate ref.</b> | <b>Origin</b>                                        | <b>Date collected</b> |
|-------------------|---------------------|------------------------------------------------------|-----------------------|
| KF963276          | HKN/8/73            | Tong Yan San<br>Tsuen, Ping Shan,<br>Y.L., Hong Kong | 30. Mar. 1973         |
| KF963277          | HKN/18/74           | Lo Shu Leng, Ta<br>Kwu Ling, N.T.,<br>Hong Kong      | 11. Sep. 1974         |
| KF963278          | HKN/25/75           | Shueng Tsuen, Pat<br>Heung, Y.L., N.T.,<br>Hong Kong | 1. Mar. 1975          |
| KF963274          | HKN/1/77            | Pak Sah, Sap Pat<br>Hueng, Y.L., Hong<br>Kong        | 10. Mar. 1976         |
| KF963275          | HKN/5/77            | Ping Che, Ta Kwu<br>Ling, N.T., Hong<br>Kong         | 7. May 1976           |
| AY429470          | HK'70               | Hong Kong                                            |                       |
| X54521            | UKG/27/72           | United Kingdom                                       | 11. Dec. 1972         |
| D16364            | J1'73               | Japan                                                | Nov.-Dec. 1973        |
| D00435            | H3'76               | Japan                                                | 1976                  |
| AF268065          | NET/1/92            | Netherlands                                          | 1992                  |
| EU151450          | ITL/1/92            | Italy                                                | 1. Jun. 1992          |
| EU151454          | ITL/2/92            | Italy                                                | 2. Sep. 1992          |
| EU151451          | ITL/6/92            | Italy                                                | 16. Jun. 1992         |
| EU151452          | ITL/8/92            | Italy                                                | 14. Aug. 1992         |
| EU151448          | ITL/18/92           | Italy                                                | 5. Nov. 1992          |
| EU151455          | ITL/19/92           | Italy                                                | 16. Nov. 1992         |
| EU151456          | ITL/1/97            | Italy                                                | 30. Jan. 1997         |
| EU151457          | ITL/2/97            | Italy                                                | 3. Feb. 1997          |
| EU151449          | ITL/3/97            | Italy                                                | 7. Feb. 1997          |
| EU151458          | ITL/10/98           | Italy                                                | 2. Nov. 1998          |
| EU151459          | ITL/1/99            | Italy                                                | 11. Jan. 1999         |
| EU151460          | ITL/3/99            | Italy                                                | 25. Jan. 1999         |
| EU151461          | ITL/5/99            | Italy                                                | 4. Feb. 1999          |
| EU151453          | ITL/7/99            | Italy                                                | 5. Feb. 1999          |

## SUPPLEMENTARY TABLE S5

### Analyses run in GARLI

| Alignment       | #Taxa | Length | Model                            |
|-----------------|-------|--------|----------------------------------|
| 5'UTR           | 189   | 741    | SYM [012345] eq. freq. + I + 4G  |
| 1A (VP4)        | 180   | 207    | TIM2 [010232] + I + 4G           |
| 1B (VP2)        | 124   | 767    | TIM2 [010232] + I + 4G           |
| 1C (VP3)        | 98    | 714    | TIM2 [010232] eq. freq. + 4G     |
| 1D (VP1)        | 427   | 850    | GTR + 4G                         |
| 2A              | 197   | 450    | TIM2 [010232] eq. freq. + I + 4G |
| 2C              | 307   | 987    | GTR + I + 4G                     |
| 3C (Protease)   | 218   | 549    | GTR + I + 4G                     |
| 3D (Polymerase) | 489   | 1386   | GTR + I + 4G                     |

## SUPPLEMENTARY TABLE S6

### Parameter priors used in BEAST analyses

| <b>Parameter</b>       | <b>Prior</b>                                  | <b>Bound</b>  |
|------------------------|-----------------------------------------------|---------------|
| CP1+2.kappa            | LogNormal [1, 1.25], initial = 2              | [0, inf.]     |
| CP3.kappa              | LogNormal [1, 1.25], initial = 2              | [0, inf.]     |
| CP1+2.mu               | LogNormal [0, 1], initial = 1                 | [0, inf.]     |
| CP3.mu                 | LogNormal [0, 1], initial = 1                 | [0, inf.]     |
| frequencies            | Uniform [0, 1], initial = 0.25                | [0, 1]        |
| CP1+2.alpha            | Exponential [0.5], initial = 0.5              | [0, inf.]     |
| CP3.alpha              | Exponential [0.5], initial = 0.5              | [0, inf.]     |
| clock.rate             | Gamma [0.001, 1000], initial = 1              | [0, inf.]     |
| uced.mean              | Gamma [0.001, 1000], initial = 1              | [0, inf.]     |
| ucl.d.mean             | Gamma [0.001, 1000], initial = 1              | [0, inf.]     |
| ucl.d.stdev            | Exponential [0.333333], initial = 0.3333...   | [0, inf.]     |
| treeModel.rootHeight   | Using Tree Prior in [40.167123, inf.]         | ←             |
| constant.popSize       | Gamma [0.001, 1000], initial = 10             | [0, inf.]     |
| exponential.popSize    | Gamma [0.001, 1000], initial = 10             | [0, inf.]     |
| logistic.popSize       | Gamma [0.001, 1000], initial = 10             | [0, inf.]     |
| skyline.popSize        | Exponential [1000], initial = 100             | [0, inf.]     |
| exponential.growthRate | Laplace [0, 0.023026], initial = 0.4          | [-inf., inf.] |
| logistic.growthRate    | Laplace [0, 0.017269], initial = 1            | [-inf., inf.] |
| logistic.t50           | Gamma [0.001, 1000], initial = 1              | [0, inf.]     |
| meanRate               | Indirectly Specified Through Other Parameters | n/a           |
| covariance             | Indirectly Specified Through Other Parameters | n/a           |
| coefficientOfVariation | Indirectly Specified Through Other Parameters | n/a           |
| origin                 | Exponential [100], initial = 440              | [0, inf.]     |
| R0                     | LogNormal [1, 1], initial = 5                 | [0, inf.]     |
| recoveryRate           | Gamma [1, 1], initial = 0.05                  | [0, inf.]     |
| samplingProbability    | Beta [1, 1], initial = 0.05                   | [0, 1]        |
